# Supplementary material
Source: Springer Nature journal article supplement (https://www.springermedizin.de/resource/supplementary/12960_2008_152_MOESM1_ESM.pdf/9570522)
Supplement: MOESM1 [file 9570522]

Percentage of total registered students

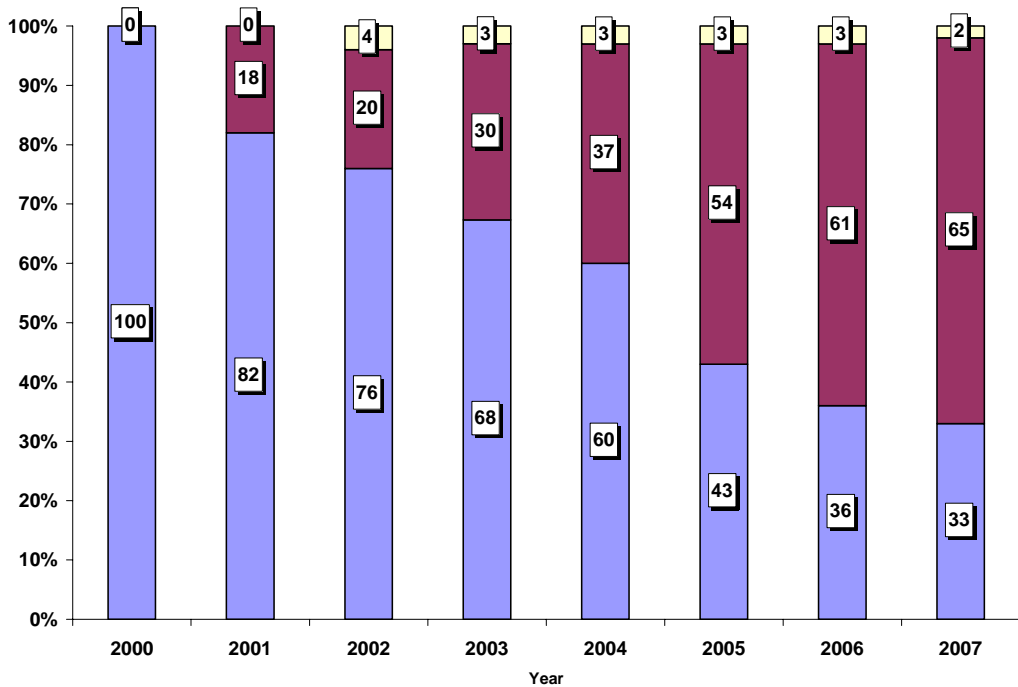

Based in SA Based in other African Countries Outside Africa
